# Supplementary material for: Two-dimensional (6,3) networks obtained with the {Cu3(Hmesox)3}3− secondary building unit (H4mesox = mesoxalic acid)
Source: Royal Society of Chemistry journal article supplement (doi:10.1039/c2ce06418a), 2012-01-01
Supplement: c2ce06418a.pdf [file c2ce06418a.pdf]

## Electronic Supplementary Information

### Two-dimensional (6,3) networks obtained with the $\{\text{Cu}_3(\text{Hmesox})_3\}^{3-}$ secondary building unit. ( $\text{H}_4\text{mesox}$ = mesoxalic acid)

Beatriz Gil-Hernández,<sup>a</sup> Pedro Gili,<sup>a</sup> Jorge Pasán,<sup>b</sup> Joaquín Sanchiz,<sup>a,\*</sup> Catalina Ruiz-Pérez<sup>b,\*</sup>

<sup>a</sup>Grupo de Materiales Magnéticos, Departamento de Química Inorgánica, Universidad de La Laguna, Av. Astrofísico Francisco Sánchez, s/n, 38206, La Laguna (Tenerife), Spain. Tel +34 922 316502 ext 5425; E-mail: [jsanchiz@ull.es](mailto:jsanchiz@ull.es), [pgili@ull.es](mailto:pgili@ull.es), [beagher@ull.es](mailto:beagher@ull.es)

<sup>b</sup>Laboratorio de Rayos X y Materiales Moleculares, Departamento de Física Fundamental II, Facultad de Física, Universidad de La Laguna, Av. Astrofísico Francisco Sánchez s/n, 38206 La Laguna (Tenerife), Spain. Tel +34 922 318236; E-mail: [caruiz@ull.es](mailto:caruiz@ull.es), [jpasang@ull.es](mailto:jpasang@ull.es).

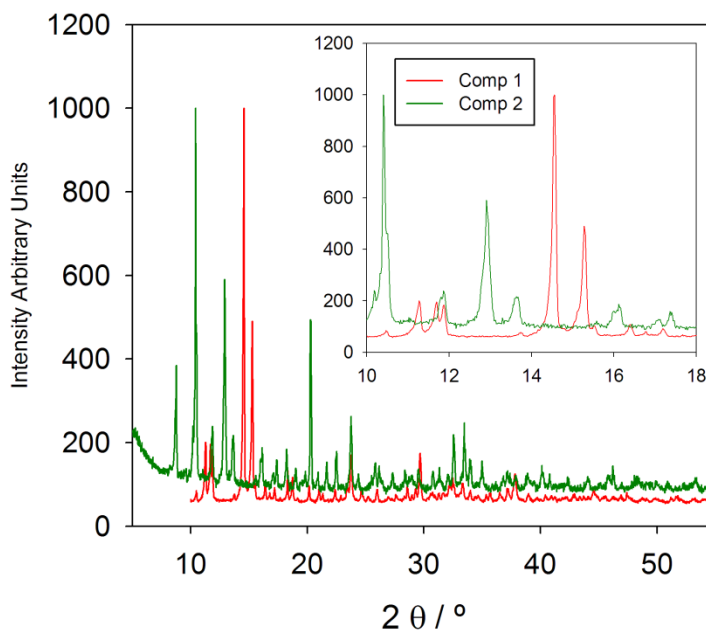

**Fig. S1** X-Ray powder diffraction patterns of polycrystalline samples of compounds **1** and **2**. The insert show the same patterns but in the  $10^\circ$  to  $18^\circ$  range.

## Electronic Supplementary Information

### Purity of the compounds

The X-Ray powder diffraction patterns of polycrystalline samples of compounds  $[\text{La}(\text{H}_2\text{O})_3\text{Cu}_3(\text{Hmesox})_3(\text{H}_2\text{O})_5] \cdot 8\text{H}_2\text{O}$  (**1**) and  $[\text{La}(\text{H}_2\text{O})_2\text{Cu}_3(\text{Hmesox})_3(\text{H}_2\text{O})_3] \cdot 7\text{H}_2\text{O}$  (**2**) are shown in Fig S1. Both compounds display very different patterns. The insert shows the spectra between  $10^\circ$  and  $18^\circ$ , it can be seen that the spectra of both compounds do not display coincidences, thus the intense peak shown by compound **2** at  $13^\circ$  is not observed in the polycrystalline sample of **1** and the intense peak observed at  $14.5^\circ$  for a polycrystalline sample of **1** is not observed in the pattern of that of **2**, so we can conclude that the samples are not contaminated one by the other.

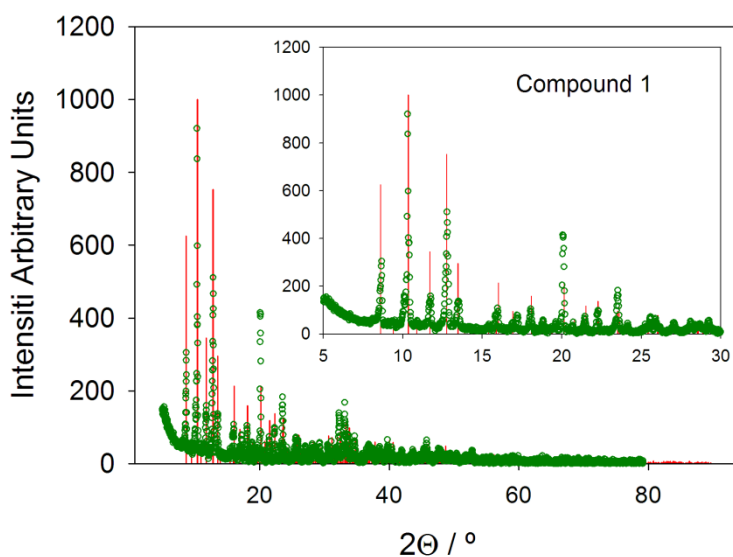

**Fig. S2** Simulated (red lines) and the experimental (green dots) powder diffraction patterns for compound **1**. The simulation is performed with the DIAMOND<sup>1</sup> program from the .cif file obtained by the X-ray diffraction of a single crystal of **1**.

**Figure S2** shows the simulated and the experimental powder diffraction patterns for compound **1**. The simulated spectrum has been generated with the Diamond program from the .cif file. It can be observed that the experimental spectrum matches very well the simulation. Similarly the simulated and the experimental powder diffraction patterns for compound **2** are shown in **Figure S3**. Also the simulated and the experimental spectra have a very good matching. So the polycrystalline samples correspond to the single crystals.

## Electronic Supplementary Information

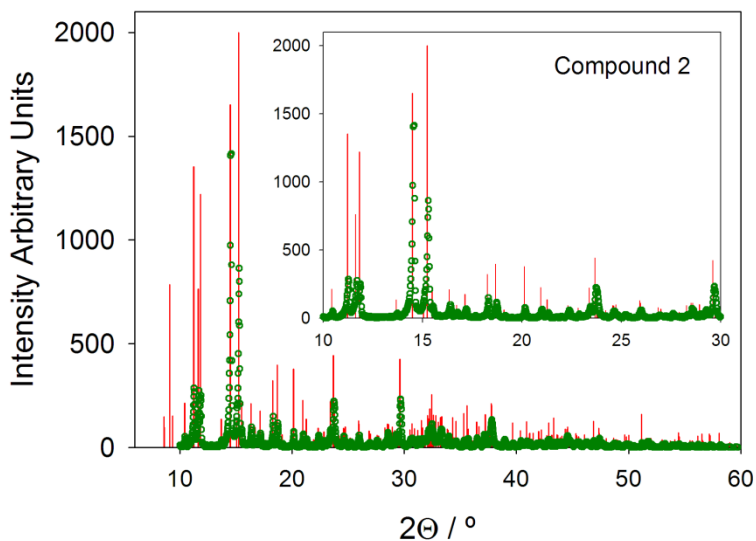

**Fig. S3** Simulated (red lines) and the experimental (green dots) powder diffraction patterns for compound **2**. The simulation is performed with the DIAMOND<sup>1</sup> program from the .cif file obtained by the X-ray diffraction of a single crystal of **2**.

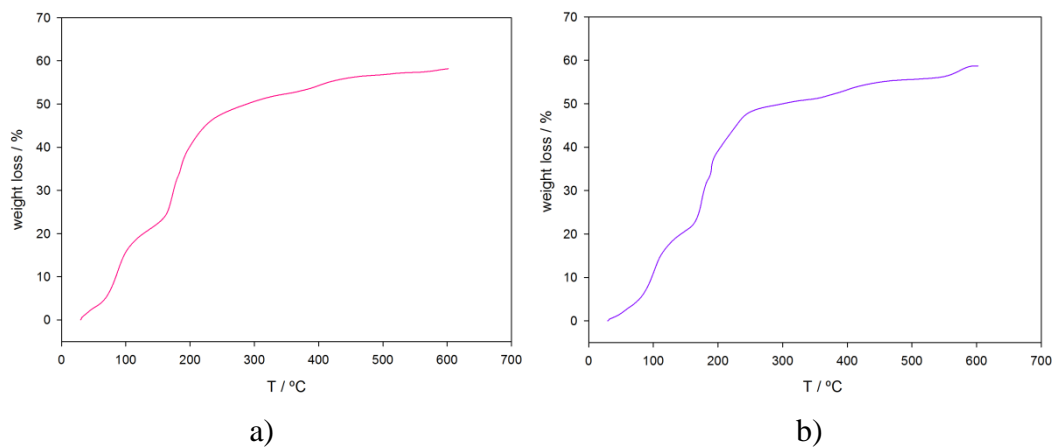

**Fig. S4** TGA curves for **1** (a) and **2** (b). The sample were heated to 600 °C at the heating rate of 5 °C /min

### TG measurements

Compound **1** in a first step, from room temperature to 140°C, exhibits a weight loss of a ca. 23.3% consistent with the loss of thirteen crystallization water molecules, the eight crystallization water molecules and five weakly bound coordination water molecules. Then at temperatures above 180°C the degradation of the organic ligand takes place.

## Electronic Supplementary Information

In a first step, from room temperature to 120°C, compound **2** shows a weight loss of a ca. 19.1%, consistent with the loss of ten water molecules which correspond to the seven crystallization water molecules and three weakly bound coordination water molecules. Then at temperatures above 180°C the degradation of the organic ligand takes place.

### References

1. K. Brandenburg, in *Diamond (Version 3.2c), Crystal and Molecular Structure Visualization*, Crystal Impact - K. Brandenburg & H. Putz Gbr Bonn (Germany); <http://www.Crystalimpact.com/diamond>, 2009.
